# Supplementary material for: PD-1 Blockade Aggravates Epstein–Barr Virus+ Post-Transplant Lymphoproliferative Disorder in Humanized Mice Resulting in Central Nervous System Involvement and CD4+ T Cell Dysregulations
Source: PubMed Central journal article supplement (PMC7837057; doi:10.3389/fonc.2020.614876), 2021-01-12
Supplement: Table_8.pdf [file Table_8.pdf]

**Supplementary Table 8. Data of flow cytometry analyses from organs for M81 model.** Control (N=6) versus Pembrolizumab-treated mice (N=5, SPL, BM, Thy; N=3, LN).

| M81<br>Variable                                                                                    | Mean  | SD      | Mean               | SD                 | Unpaired Welch's t test                            |                                      |
|----------------------------------------------------------------------------------------------------|-------|---------|--------------------|--------------------|----------------------------------------------------|--------------------------------------|
|                                                                                                    | CTR   | CTR     | Pembro<br>(merged) | Pembro<br>(merged) | Mean<br>Difference<br>CTR vs<br>Pembro<br>(merged) | P-value<br>CTR vs Pembro<br>(merged) |
| <b>Spleen</b>                                                                                      |       |         |                    |                    |                                                    |                                      |
| #CD8 <sup>+</sup> /CD45 <sup>+</sup>                                                               | 7,082 | 0,2718  | 6,552              | 0,3818             | -0,5293                                            | <b>0,0351</b>                        |
| #CD4 <sup>+</sup> /CD45 <sup>+</sup>                                                               | 6,927 | 0,3116  | 6,018              | 0,3666             | -0,9085                                            | <b>0,0024</b>                        |
| %CD8 <sup>+</sup> in CD45 <sup>+</sup>                                                             | 50,1  | 4,9     | 32,1               | 27,8               | 17,9                                               | 0,2235                               |
| %CD4 <sup>+</sup> in CD45 <sup>+</sup>                                                             | 35,3  | 5,9     | 8,3                | 5,2                | 27                                                 | <b>&lt;0,0001</b>                    |
| MFI PD1/CD8                                                                                        | 4,996 | 0,08639 | 3,875              | 0,7680             | -1,121                                             | <b>0,0305</b>                        |
| MFI PD1/CD4                                                                                        | 5,154 | 0,0617  | 3,987              | 0,5894             | -1,167                                             | <b>0,0112</b>                        |
| %TIM-3 <sup>+</sup> in CD8 <sup>+</sup> /PD1 <sup>+</sup>                                          | 1,3   | 0,9     | 23,4               | 29,9               | -22,2                                              | 0,1727                               |
| %TIM-3 <sup>+</sup> in CD8 <sup>+</sup> /PD1 <sup>+</sup>                                          | 26,2  | 10,0    | 36,7               | 28,6               | -10,5                                              | 0,4722                               |
| %TIM-3 <sup>+</sup> in CD4 <sup>+</sup> /PD1 <sup>+</sup>                                          | 0,6   | 0,2     | 12,5               | 12,7               | -11,9                                              | 0,1038                               |
| %TIM-3 <sup>+</sup> in CD4 <sup>+</sup> /PD1 <sup>+</sup>                                          | 13,1  | 5,4     | 32,3               | 21,8               | -19,2                                              | 0,1194                               |
| %LAG-3 <sup>+</sup> in CD8 <sup>+</sup> /CD69 <sup>-</sup>                                         | 19,1  | 2,6     | 15,5               | 4,5                | 3,6                                                | 0,1602                               |
| %LAG-3 <sup>+</sup> in CD8 <sup>+</sup> /CD69 <sup>+</sup>                                         | 21,7  | 7,1     | 57,9               | 20,9               | -36,2                                              | <b>0,0152</b>                        |
| %LAG-3 <sup>+</sup> in CD4 <sup>+</sup> /CD69 <sup>-</sup>                                         | 14,8  | 2,9     | 12,1               | 6,8                | 2,7                                                | 0,4493                               |
| %LAG-3 <sup>+</sup> in CD4 <sup>+</sup> /CD69 <sup>+</sup>                                         | 18,8  | 6,1     | 57,6               | 27,5               | -38,8                                              | <b>0,0329</b>                        |
| %CD25 <sup>+</sup> /FoxP3 <sup>+</sup> in CD4 <sup>+</sup>                                         | 3,1   | 0,764   | 20,1               | 14,7               | -17,0                                              | 0,0609                               |
| %CD45RA <sup>+</sup> /CD25 <sup>+</sup> /FoxP3 <sup>+</sup> in CD4 <sup>+</sup>                    | 2,8   | 0,6     | 10,3               | 5,7                | 7,6                                                | <b>0,0407</b>                        |
| %CD25 <sup>+</sup> /FoxP3 <sup>+</sup> in CD45 <sup>+</sup> /CD4 <sup>+</sup>                      | 0,4   | 0,2     | 6,4                | 5,9                | 6,0                                                | 0,0868                               |
| %CD45RA <sup>+</sup> /CD25 <sup>+</sup> /FoxP3 <sup>+</sup> in CD45 <sup>+</sup> /CD4 <sup>+</sup> | 0,2   | 0,07    | 3,6                | 3,2                | 3,3                                                | 0,0847                               |
| <b>Bone Marrow</b>                                                                                 |       |         |                    |                    |                                                    |                                      |
| #CD8 <sup>+</sup> /CD45 <sup>+</sup>                                                               | 6,305 | 0,1993  | 6,196              | 0,1644             | -0,1088                                            | 0,4144                               |
| #CD4 <sup>+</sup> /CD45 <sup>+</sup>                                                               | 6,230 | 0,2079  | 5,461              | 0,5021             | -0,7695                                            | <b>0,0231</b>                        |
| %CD8 <sup>+</sup> in CD45 <sup>+</sup>                                                             | 31,77 | 8,40    | 29,47              | 21,41              | 2,3                                                | 0,8302                               |
| %CD4 <sup>+</sup> in CD45 <sup>+</sup>                                                             | 26,07 | 5,95    | 9,77               | 9,77               | 16,3                                               | <b>0,0159</b>                        |
| MFI PD1/CD8                                                                                        | 3,947 | 0,07807 | 3,421              | 0,6368             | -0,5252                                            | 0,1390                               |
| MFI PD1/CD4                                                                                        | 4,139 | 0,06208 | 3,726              | 0,3690             | -0,4132                                            | 0,0658                               |
| <b>Lymph node</b>                                                                                  |       |         |                    |                    |                                                    |                                      |
| #CD8 <sup>+</sup> /CD45 <sup>+</sup>                                                               | 5,225 | 0,3482  | 4,837              | 1,534              | -0,3872                                            | 0,7819                               |
| #CD4 <sup>+</sup> /CD45 <sup>+</sup>                                                               | 5,122 | 0,4682  | 4,652              | 2,117              | -0,4701                                            | 0,8065                               |
| %CD8 <sup>+</sup> in CD45 <sup>+</sup>                                                             | 46,6  | 13,8    | 25,1               | 11,9               | 21,5                                               | 0,0634                               |
| %CD4 <sup>+</sup> in CD45 <sup>+</sup>                                                             | 37,7  | 13,0    | 20,2               | 25,8               | 17,5                                               | 0,3622                               |
| MFI PD1/CD8                                                                                        | 4,982 | 0,07252 | 3,990              | 0,2084             | -0,9912                                            | <b>0,0108</b>                        |
| MFI PD1/CD4                                                                                        | 5,180 | 0,0523  | 3,932              | 0,2135             | -1,249                                             | <b>0,0081</b>                        |
| <b>Thymus</b>                                                                                      |       |         |                    |                    |                                                    |                                      |
| #CD8 <sup>+</sup> /CD45 <sup>+</sup>                                                               | 4,947 | 0,2685  | 5,009              | 0,3838             | 0,06199                                            | 0,7697                               |
| #CD4 <sup>+</sup> /CD45 <sup>+</sup>                                                               | 5,403 | 0,3096  | 5,429              | 0,2930             | 0,02571                                            | 0,8909                               |
| %CD8 <sup>+</sup> in CD45 <sup>+</sup>                                                             | 3,6   | 1,2     | 6,3                | 4,7                | -2,66                                              | 0,2800                               |
| %CD4 <sup>+</sup> in CD45 <sup>+</sup>                                                             | 11,3  | 7,7     | 17,4               | 16,1               | -6,17                                              | 0,4640                               |
| MFI PD1/CD8                                                                                        | 4,679 | 0,1004  | 4,160              | 0,3787             | -0,5185                                            | <b>0,0356</b>                        |
| MFI PD1/CD4                                                                                        | 4,257 | 0,06919 | 3,982              | 0,3238             | -0,2750                                            | 0,1307                               |

\* - original values were log-transformed before statistical tests
