# Supplementary material for: PD-1 Blockade Aggravates Epstein–Barr Virus+ Post-Transplant Lymphoproliferative Disorder in Humanized Mice Resulting in Central Nervous System Involvement and CD4+ T Cell Dysregulations
Source: PubMed Central journal article supplement (PMC7837057; doi:10.3389/fonc.2020.614876), 2021-01-12
Supplement: Table_9.pdf [file Table_9.pdf]

**Supplementary Table 9. Tissue multiplex IHC analyses.** Data shown for control versus Pembrolizumab-treated mice in B95-8/fLuc model.

|                                                        |                                                       |       | Unpaired Welch's t test |                 |                        |                        |
|--------------------------------------------------------|-------------------------------------------------------|-------|-------------------------|-----------------|------------------------|------------------------|
| B95-8                                                  | Mean                                                  | SD    | Mean                    | SD              | Mean Difference        | P-value                |
| Tissue/ Marker                                         | PBS                                                   | PBS   | Pembro (merged)         | Pembro (merged) | CTR vs Pembro (merged) | CTR vs Pembro (merged) |
| <b>Liver</b>                                           | <b>Control (n=3) and Pembrolizumab-treated (n=11)</b> |       |                         |                 |                        |                        |
| <b>Parenchyma</b>                                      |                                                       |       |                         |                 |                        |                        |
| #CD4 <sup>+</sup> /Ki67 <sup>+</sup> /mm <sup>2</sup>  | 31,4                                                  | 20,52 | 19,13                   | 11,16           | 12,26                  | 0,4111                 |
| #CD8 <sup>+</sup> /Ki67 <sup>+</sup> /mm <sup>2</sup>  | 207,3                                                 | 143,1 | 457,6                   | 324,1           | -250,4                 | 0,0849                 |
| #CD4 <sup>+</sup> /FoxP3 <sup>+</sup> /mm <sup>2</sup> | 1,651                                                 | 0,564 | 1,224                   | 1,207           | 0,4267                 | 0,4085                 |
| #CD8 <sup>+</sup> /FoxP3 <sup>+</sup> /mm <sup>2</sup> | 0                                                     | 0     | 0,285                   | 0,477           | -0,2854                | 0,0755                 |
| <b>Tumor</b>                                           |                                                       |       |                         |                 |                        |                        |
| #CD4 <sup>+</sup> /Ki67 <sup>+</sup> /mm <sup>2</sup>  | 325,7                                                 | 278,7 | 49,69                   | 65,19           | 276,1                  | 0,2270                 |
| #CD8 <sup>+</sup> /Ki67 <sup>+</sup> /mm <sup>2</sup>  | 1412,0                                                | 141,4 | 1848                    | 1049            | -436,3                 | 0,2084                 |
| #CD4 <sup>+</sup> /FoxP3 <sup>+</sup> /mm <sup>2</sup> | 0,23                                                  | 0,407 | 5,617                   | 9,449           | -5,382                 | 0,0887                 |
| #CD8 <sup>+</sup> /FoxP3 <sup>+</sup> /mm <sup>2</sup> | 11,16                                                 | 19,33 | 2,589                   | 4,837           | 8,569                  | 0,5236                 |
| #CD4 <sup>+</sup> /FoxP3 <sup>+</sup> Ø CD4            | 0,016                                                 | 0,027 | 0,352                   | 0,400           | -0,336                 | <b>0,0193</b>          |
| #CD8 <sup>+</sup> /FoxP3 <sup>+</sup> Ø CD4            | 0,016                                                 | 0,028 | 0,103                   | 0,210           | -0,087                 | 0,2092                 |
| #CD4 <sup>+</sup> /FoxP3 <sup>+</sup> Ø CD8            | 0,009                                                 | 0,016 | 0,249                   | 0,302           | -0,24                  | <b>0,0251</b>          |
| #CD8 <sup>+</sup> /FoxP3 <sup>+</sup> Ø CD8            | 0,004                                                 | 0,007 | 0,120                   | 0,177           | -0,116                 | 0,0558                 |
| <b>Spleen</b>                                          | <b>Control (n=2) and Pembrolizumab-treated (n=11)</b> |       |                         |                 |                        |                        |
| <b>Parenchyma</b>                                      |                                                       |       |                         |                 |                        |                        |
| #CD4 <sup>+</sup> /Ki67 <sup>+</sup> /mm <sup>2</sup>  | 284,2                                                 | 366,6 | 204,2                   | 251,9           | 80,03                  | 0,8107                 |
| #CD8 <sup>+</sup> /Ki67 <sup>+</sup> /mm <sup>2</sup>  | 2801                                                  | 2291  | 3558                    | 1303            | -757                   | 0,7219                 |
| #CD4 <sup>+</sup> /FoxP3 <sup>+</sup> /mm <sup>2</sup> | 21,25                                                 | 30,06 | 15,85                   | 26,06           | 5,404                  | 0,8438                 |
| #CD8 <sup>+</sup> /FoxP3 <sup>+</sup> /mm <sup>2</sup> | 4,375                                                 | 3,663 | 9,556                   | 12,41           | -5,181                 | 0,2944                 |
| <b>Tumor</b>                                           |                                                       |       |                         |                 |                        |                        |
| #CD4 <sup>+</sup> /Ki67 <sup>+</sup> /mm <sup>2</sup>  | 259,8                                                 | 362,8 | 86,66                   | 135,4           | 173,2                  | 0,6212                 |
| #CD8 <sup>+</sup> /Ki67 <sup>+</sup> /mm <sup>2</sup>  | 927,8                                                 | 121   | 1849                    | 891,2           | -921,1                 | <b>0,0075</b>          |
| #CD4 <sup>+</sup> /FoxP3 <sup>+</sup> /mm <sup>2</sup> | 15,92                                                 | 22,51 | 8,539                   | 15,36           | 7,38                   | 0,7243                 |
| #CD8 <sup>+</sup> /FoxP3 <sup>+</sup> /mm <sup>2</sup> | 3,106                                                 | 4,393 | 6,654                   | 11,25           | -3,548                 | 0,4814                 |
