# Supplementary material for: PD-1 Blockade Aggravates Epstein–Barr Virus+ Post-Transplant Lymphoproliferative Disorder in Humanized Mice Resulting in Central Nervous System Involvement and CD4+ T Cell Dysregulations
Source: PubMed Central journal article supplement (PMC7837057; doi:10.3389/fonc.2020.614876), 2021-01-12
Supplement: Table_10.pdf [file Table_10.pdf]

**Supplementary Table 10. Antibodies used in the study:**

| Antigen                      | Detection    | Vendor            | Dilution | Catalogue # |
|------------------------------|--------------|-------------------|----------|-------------|
| <b>CD279 (PD-1)</b>          | PE           | Biolegend         | 1:100    | 329906      |
| <b>CD3</b>                   | BV510        | Biolegend         | 1:100    | 300448      |
| <b>CD4</b>                   | PerCP        | Biolegend         | 1:250    | 317432      |
| <b>CD4</b>                   | AH7          | BD                | 1:100    | 560158      |
| <b>CD45</b>                  | Pacific Blue | Biolegend         | 1:100    | 304022      |
| <b>CD45RA</b>                | FITC         | Beckman Coulter   | 1:100    | A07786      |
| <b>CD8a</b>                  | PE-Cy7       | Biolegend         | 1:100    | 300914      |
| <b>CD8a</b>                  | FITC         | Biolegend         |          |             |
| <b>CD19</b>                  | AL700        | Biolegend         | 1:250    | 302226      |
| <b>FoxP3</b>                 | PE           | BD                | 1:50     | 560046      |
| <b>CD25</b>                  | APC          | Biolegend         | 1:100    | 101909      |
| <b>LAG3</b>                  | PE-Cy5       | eBio              | 1:100    | 317444      |
| <b>TIM3</b>                  | APC          | eBio              | 1:100    | 345012      |
| <b>CD69</b>                  | APC          | Biolegend         | 1:100    | 310910      |
| <b><u>Histopathology</u></b> |              |                   |          |             |
| <b>CD4</b>                   | Opal520      | ZYTOMED           | 1:50     | 503-3354    |
| <b>CD8</b>                   | Opal570      | Dako              | 1:600    | M7103       |
| <b>FoxP3</b>                 | Opal620      | Abcam             | 1:200    | Ab20034     |
| <b>CD20</b>                  | Opal650      | Dako              | 1:500    | M0755       |
| <b>Ki67</b>                  | Opal690      | Thermo scientific | 1:200    | RM9106-S1   |
| <b>PDL1</b>                  | DAB          | Quartett          | 1:100    | 1/PR2992/07 |
| <b>CD30</b>                  | DAB          | Dako              | 1:50     | M0751       |
| <b>CD8</b>                   | DAB          | Dako              | 1:100    | M7103       |
| <b>CD3</b>                   | DAB          | Dako              | 1:100    | A0452       |
| <b>Anti-human IgG</b>        | HRP          | Roth              | 1:500    | 47531       |
| <b>Anti-mouse IgG</b>        | AL647        | Biolegend         | 1:250    | 405322      |
| <b>Anti-mouse IgG</b>        | AL488        | Biolegend         | 1:250    | 405319      |
| <b>CD3</b>                   | DAB          | Dako              | 1:50     | M7254       |
| <b>Anti-mouse IgG</b>        | Biotin-SP    | Jackson           | 1:200    | 115-065-207 |
